# Supplementary material
Source: PubMed Central journal article supplement (PMC6985735)
Supplement: AAC.01879-19-s0001.pdf [file AAC.01879-19-s0001.pdf]

**Table S1.** List of bacterial strains used in this study.

| Name                                     | Description/genotype                                                                                   | Marker | Reference                                  |
|------------------------------------------|--------------------------------------------------------------------------------------------------------|--------|--------------------------------------------|
| <b>Strains</b>                           |                                                                                                        |        |                                            |
| <i>M. abscessus</i> Smooth (S)           | <i>M. abscessus sensu stricto</i> , strain CIP104536 <sup>T</sup> , S morphotype                       | –      | Laboratoire de Référence des Mycobactéries |
| <i>M. abscessus</i> Rough (R)            | <i>M. abscessus sensu stricto</i> , strain CIP104536 <sup>T</sup> , R morphotype                       | –      | Laboratoire de Référence des Mycobactéries |
| <i>M. massiliense</i> (R)                | <i>M. abscessus massiliense</i> , strain CIP108297 <sup>T</sup> , R morphotype                         | –      | Laboratoire de Référence des Mycobactéries |
| <i>M. bolletii</i> (S)                   | <i>M. abscessus bolletii</i> , strain CIP108541 <sup>T</sup> , S morphotype                            | –      | Laboratoire de Référence des Mycobactéries |
| <i>M. abscessus</i> S 1298 (S)           | <i>M. abscessus sensu stricto</i> , clinical isolate from a cystic fibrosis (CF) patient, S morphotype | –      | (1)                                        |
| <i>M. abscessus</i> S 2069 (S)           | <i>M. abscessus sensu stricto</i> , clinical isolate from a non-CF patient, S morphotype               | –      | (1)                                        |
| <i>M. abscessus</i> R 2648 (R)           | <i>M. abscessus sensu stricto</i> , clinical isolate from a CF patient, R morphotype                   | –      | (1)                                        |
| <i>M. abscessus</i> R 3022 (R)           | <i>M. abscessus sensu stricto</i> , clinical isolate from a non-CF patient, R morphotype               | –      | (1)                                        |
| <i>M. abscessus</i> S - $\Delta$ erm(41) | erm(41) unmarked deletion mutant in the S variant of CIP104536 <sup>T</sup>                            | -      | This study                                 |
| <i>E. coli</i> XL1-Blue                  | recA1 endA1 gyrA96 thi-1 hsdR17 supE44 relA1 lac [F' proAB lacIqZ $\Delta$ M15 Tn10 (Tetr)].           | Tet    | Stratagene                                 |

**Table S2.** PCR primers used in this study. Fow and Rev stand for forward and reverse, respectively.

| Primers                                           | 5' to 3' sequence                                                                                          |
|---------------------------------------------------|------------------------------------------------------------------------------------------------------------|
| <b>Cloning in pMV261_ <i>lacZ</i> derivatives</b> |                                                                                                            |
| P <sub>123</sub> Fow                              | GGTATAT <u>CTAGAG</u> CGGCACGTTCTGACGAAAGAA (XbaI)                                                         |
| P <sub>123</sub> Rev                              | GGTATAGGAT <u>CCGACG</u> CAGCACCATCATGAATA (BamHI)                                                         |
| P <sub>92</sub> Fow                               | GGTATAT <u>CTAGAA</u> TGGCGACCGGGCCTTCTTCGTG (XbaI)                                                        |
| P <sub>61</sub> Fow                               | GGTATAT <u>CTAGAG</u> AAACCAGTTGCATGCCCGATAT (XbaI)                                                        |
| P <sub>38</sub> Fow                               | <u>CTAGAT</u> CCTTTGGAGCATGGGCATATTCATGATGGTGCTGCGT <u>CG</u> (XbaI)                                       |
| P <sub>38</sub> Rev                               | <u>GATCCG</u> ACGCAGCACCATCATGAATATGCCCATGCTCCAAAGAT (BamHI)                                               |
| P <sub>Mut(B7)</sub> Fow                          | <u>CTAGAG</u> <b>GGGG</b> CAGTTGCATGCCCGATATCTTTGGAGCATGGGCATATTCATGATGGTGCTGCGT <u>CG</u> (XbaI)          |
| P <sub>Mut(B7)</sub> Rev                          | <u>GATCCG</u> ACGCAGCACCATCATGAATATGCCCATGCTCCAAAGATA TCGGGGCATGCAACTG <b>CCCC</b> T (BamHI)               |
| P <sub>Mut(-35)</sub> Fow                         | <u>CTAGAG</u> AAACCAG <b>CCATGC</b> CCCCGATATCTTTGGAGCATGGGCATATTCATGATGGTGCTGCGT <u>CG</u> (XbaI)         |
| P <sub>Mut(-35)</sub> Rev                         | <u>GATCCG</u> ACGCAGCACCATCATGAATATGCCCATGCTCCAAAGATA TCGGGG <b>GCATGG</b> CTGGTTTCT (BamHI)               |
| P <sub>Mut(B7/-35)</sub> Fow                      | <u>CTAGAG</u> <b>GGGG</b> CAG <b>CCATGC</b> CCCCGATATCTTTGGAGCATGGGCATATTCATGATGGTGCTGCGT <u>CG</u> (XbaI) |
| P <sub>Mut(B7/-35)</sub> Rev                      | <u>GATCCG</u> ACGCAGCACCATCATGAATATGCCCATGCTCCAAAGATA TCGGGG <b>GCATGG</b> CTG <b>CCCC</b> T (BamHI)       |
| <b>Cloning in pMV361-<i>ApraR</i></b>             |                                                                                                            |
| 361- <i>whiB7</i> Fow                             | ACTTCGCAATGATGACCGTTGAAGTGGAG                                                                              |
| 361- <i>whiB7</i> Rev                             | CTAAGCGTAATCTGGAACATCGTATGGGTATGCCGCGGCGGTGTCGCGTC                                                         |
| <b>Cloning in pMV261_P<sub>123</sub>_tdTomato</b> |                                                                                                            |
| 261-tdTomato Fow                                  | GAGAGAGGAT <u>CCGTGAG</u> CAAGGGCGAGGAG (BamHI)                                                            |
| 261-tdTomato Rev                                  | GAGAGAAAGCTTCTACTTGTACAGCTCGTC (HindIII)                                                                   |
| <b>Cloning in pUX1-<i>katG</i></b>                |                                                                                                            |
| <i>erm(41)</i> KO_U_F                             | GAGAGACAATTGCGGATCTGCAGCCGTATATC (MfeI)                                                                    |
| <i>erm(41)</i> KO_U_R                             | CCGTTGGCCGGACACGAC                                                                                         |
| <i>erm(41)</i> KO_D_F                             | TGGTGCTGCGTCGTGTCCGGCCAACGGGTGCTGGTGATCAGGCGGCGCTGA                                                        |
| <i>erm(41)</i> KO_D_R                             | GAGAGAGCTAGCTGCACCAGAACGGCGCGT (XbaI)                                                                      |
| <b>Sequencing</b>                                 |                                                                                                            |
| pMV5' Ext                                         | CGCCGGCCAGCGTAAGTAGC                                                                                       |
| <i>lacZ</i> intern Rev                            | GATACAGCGCGTCGTGATTA                                                                                       |
| <i>erm(41)</i> Fow                                | ACGCCGAGGCCGAGCGCCGTCACA                                                                                   |
| <i>erm(41)</i> Rev                                | CGCAGTATCGTTTCTCCAAAGGCC                                                                                   |

<sup>a</sup>Restriction sites are underlined and specified inside brackets.

<sup>b</sup>Mutagenized bases are shown in bold.

**Tables S3.** List of the plasmids used in this study.

| Plasmids                                 |                                                                                                                                                                                                                       |      |                         |
|------------------------------------------|-----------------------------------------------------------------------------------------------------------------------------------------------------------------------------------------------------------------------|------|-------------------------|
| pTEC27                                   | Multicopy <i>E. coli</i> /mycobacterial shuttle vector to express <i>tdTomato</i> under the control of a strong mycobacterial promoter                                                                                | Hyg  | Addgene (plasmid 30182) |
| pMV261                                   | Multicopy <i>E. coli</i> /mycobacterial shuttle vector                                                                                                                                                                | Kan  | (2)                     |
| pMV261_P <sub><i>hsp60</i></sub> _lacZ   | The <i>hsp60</i> promoter region is cloned upstream of <i>lacZ</i> into pMV261.                                                                                                                                       | Kan  | (3)                     |
| pMV261_P <sub>123</sub> _lacZ            | The full intergenic region of <i>erm(41)</i> of 123 bp is cloned upstream of <i>lacZ</i> into pMV261.                                                                                                                 | Kan  | This study              |
| pMV261_P <sub>92</sub> _lacZ             | A truncated version of 92 bp of the <i>erm(41)</i> intergenic region is cloned upstream of <i>lacZ</i> into pMV261.                                                                                                   | Kan  | This study              |
| pMV261_P <sub>61</sub> _lacZ             | A truncated version of 61 bp of the <i>erm(41)</i> intergenic region is cloned upstream of <i>lacZ</i> into pMV261.                                                                                                   | Kan  | This study              |
| pMV261_P <sub>38</sub> _lacZ             | A truncated version of 38 bp of the <i>erm(41)</i> intergenic region is cloned upstream of <i>lacZ</i> into pMV261.                                                                                                   | Kan  | This study              |
| pMV261_P <sub>61_Mut(B7)</sub> _lacZ     | A truncated version of 61 bp of the <i>erm(41)</i> intergenic region containing mutations in the <i>whiB7</i> binding site is cloned upstream of <i>lacZ</i> into pMV261.                                             | Kan  | This study              |
| pMV261_P <sub>61_Mut(-35)</sub> _lacZ    | A truncated version of 61 bp of the <i>erm(41)</i> intergenic region containing mutation in the putative <i>erm(41)</i> -35 box is cloned upstream of <i>lacZ</i> into pMV261.                                        | Kan  | This study              |
| pMV261_P <sub>61_Mut(B7/-35)</sub> _lacZ | A truncated version of 61 bp of the <i>erm(41)</i> intergenic region containing mutation into the <i>whiB7</i> binding site and in the putative <i>erm(41)</i> -35 box is cloned upstream of <i>lacZ</i> into pMV261. | Kan  | This study              |
| pMV261_lacZ                              | The <i>lacZ</i> reporter gene is cloned into a promoter-less pMV261.                                                                                                                                                  | Kan  | (3)                     |
| pMV261_P <sub>MAB_4384</sub> _lacZ       | pMV261_lacZ carrying the promoter region of <i>MAB_4384</i> cloned upstream of <i>lacZ</i>                                                                                                                            | Kan  | (3)                     |
| pMV261_P <sub>123</sub> _tdTomato        | The red fluorescent marker <i>tdTomato</i> is cloned into the pMV261 under the control of the full/123bp <i>erm(41)</i> intergenic region.                                                                            | Kan  | This study              |
| pMV361_whiB7                             | <i>whiB7</i> cloned into the integrative vector pMV361 under the control of the strong and constitutive <i>hsp60</i> promoter.                                                                                        | Apra | This study              |

Hyg, hygromycin; Kan, kanamycin; Apra, apramycin.

## References

1. Singh S, Bouzinbi N, Chaturvedi V, Godreuil S, Kremer L. 2014. In vitro evaluation of a new drug combination against clinical isolates belonging to the *Mycobacterium abscessus* complex. *Clin Microbiol Infect* 20:O1124–O1127.
2. Stover CK, de la Cruz VF, Fuerst TR, Burlein JE, Benson LA, Bennett LT, Bansal GP, Young JF, Lee MH, Hatfull GF. 1991. New use of BCG for recombinant vaccines. *Nature* 351:456–460.
3. Richard M, Gutiérrez AV, Viljoen AJ, Ghigo E, Blaise M, Kremer L. 2018. Mechanistic and Structural Insights Into the Unique TetR-Dependent Regulation of a Drug Efflux Pump in *Mycobacterium abscessus*. *Front Microbiol* 9:649.

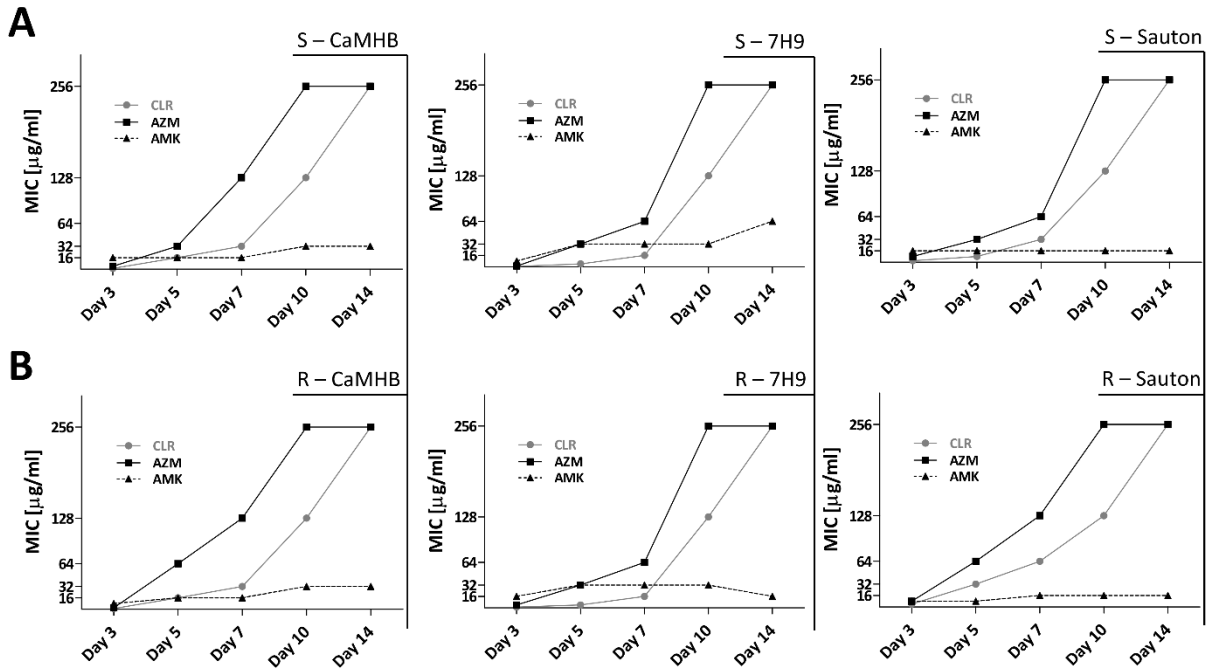

**Figure S1. Macrolide-induced resistance profile of *M. abscessus* CIP104536<sup>T</sup> smooth (A) and rough (B) variants in different broth media.** MICs of the two morphotypes were assessed over a period of 14 days in CaMHB, Sauton's medium and Middlebrook 7H9-Glycerol broth. AMK was included as a non-related control drug.

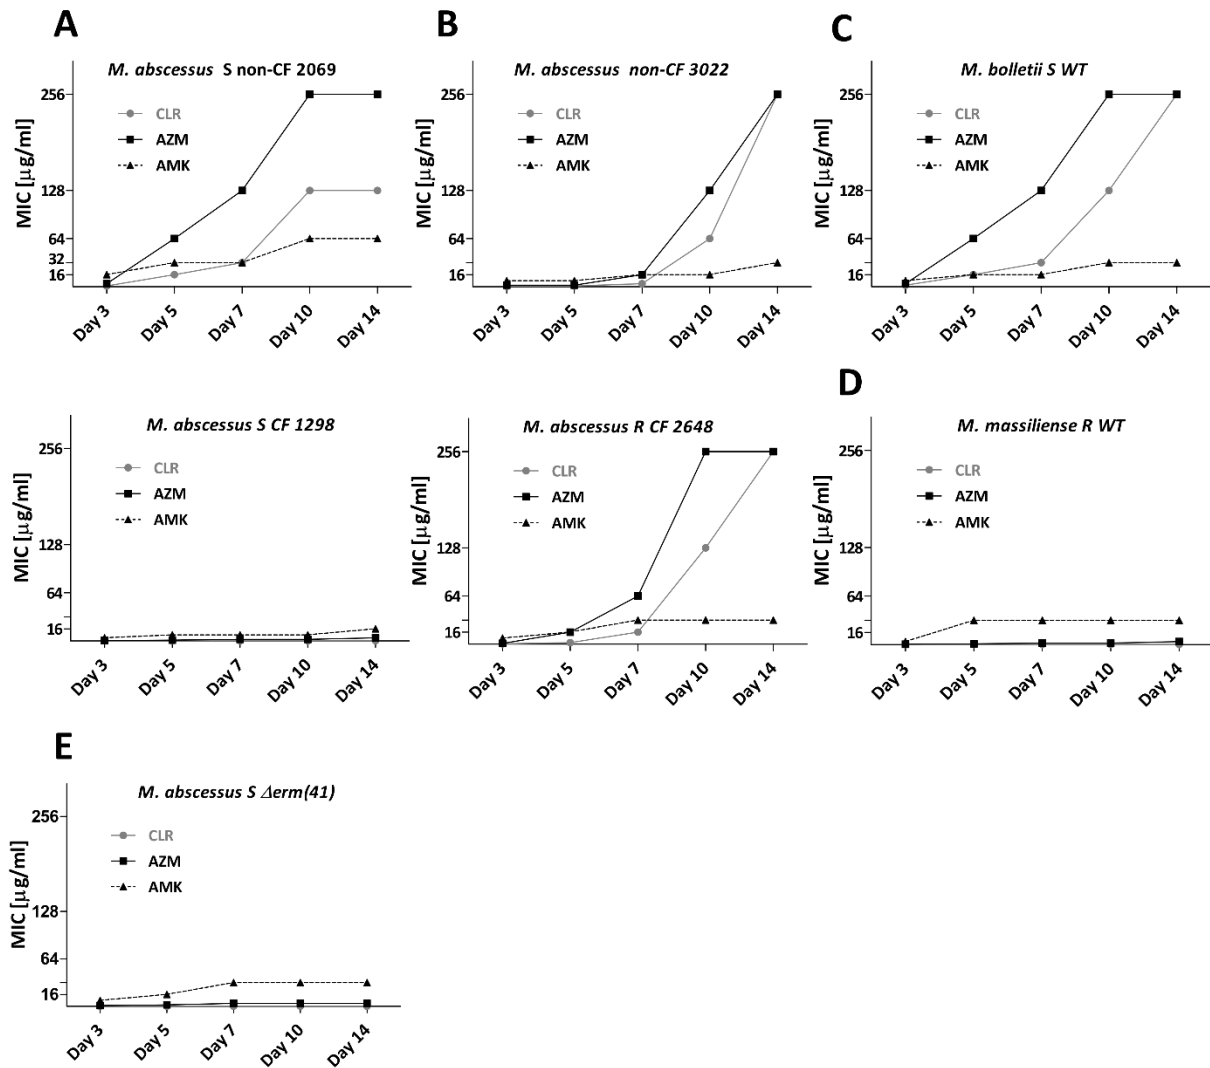

**Figure S2. Macrolide-induced resistance profile of clinical isolates in CaMHB. (A)** Smooth *M. abscessus* clinical isolates. **(B)** Rough *M. abscessus* clinical isolates. **(C)** Smooth *M. bolletii* CIP108541<sup>T</sup>. **(D)** Rough *M. massiliense* CIP108297<sup>T</sup>. **(E)** Smooth *M. abscessus* CIP104536<sup>T</sup> in which the *erm(41)* gene has been deleted by double homologous recombination using the suicide-vector pUX1-*katG*. AMK was included as a non-related control drug.

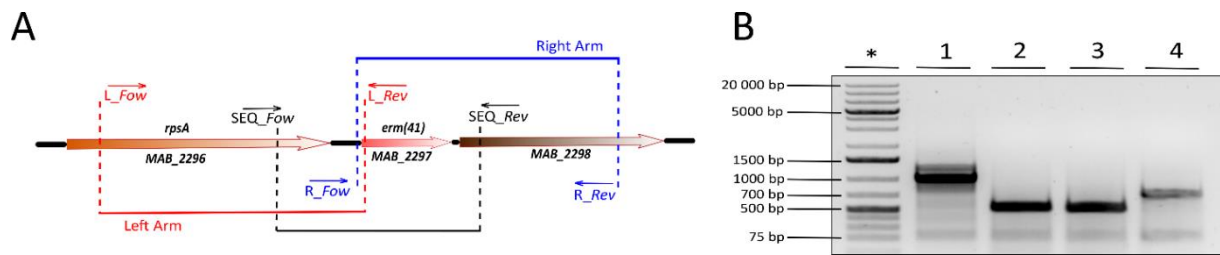

**Figure S3. Unmarked deletion of the *erm(41)* gene.** (A) Genomic environment of *erm(41)*. The L\_Fow/L\_Rev and the R\_Fow/R\_Rev primer sets were used to produce left and right arms, respectively, which were subsequently used to generate pUX1\_ *katG-erm(41)* to delete *erm(41)* by double homologous recombination. (B) 1 % agarose gel of the amplicons using the SEQ\_Fow and SEQ\_Rev primers. The expected sizes are: *M. abscessus* WT (1034 bp; lane 1), *M. abscessus*  $\Delta$ *erm(41)* Clone 1 (509 bp; lane 2), *M. abscessus*  $\Delta$ *erm(41)* Clone 2 (509 bp; lane 3) and *M. massiliense* WT (758 bp; lane 4). (\*) GeneRuler™ 1 kb Plus DNA Ladder.
